# Supplementary material
Source: PubMed Central journal article supplement (PMC3250384)
Supplement: supp_djr509_DJR509_jnci-JNCI-10-1818-s01.pdf [file supp_djr509_DJR509_jnci-JNCI-10-1818-s01.pdf]

## Supplementary Tables

**Supplementary Table 1.** Inhibitors of DNA damage response pathways used in these studies\*

| <b>Chemical Compound</b> | <b>Inhibitory Effect on</b> | <b>Concentration Used in the Study</b> |
|--------------------------|-----------------------------|----------------------------------------|
| NU7021                   | DNA-PKcs                    | 2.5 $\mu$ M                            |
| KU55933                  | ATM kinase                  | ~20 $\mu$ M                            |
| CGK733                   | ATM / ATR kinase            | ~5 $\mu$ M                             |
| lithocholic acid (LCA)   | PARP                        | 50 $\mu$ M                             |
| PARP inhibitor XIV       | PARP                        | 2 $\mu$ M                              |
| UCN-01                   | Chk1                        | ~50 nM                                 |
| ChkII inhibitor II       | Chk2                        | 1 $\mu$ M                              |
| tricitribine             | Akt                         | 5 $\mu$ M                              |
| 3-methyladenine (3-MA)   | autophagy                   | 1 mM                                   |

\*DNA-PKcs = DNA-dependent protein kinase, catalytic subunit; ATM = ataxia telangiectasia mutated; ATR = ataxia telangiectasia and Rad3-related; PARP = poly(ADP-ribose) polymerase; Chk1 = checkpoint kinase 1; Chk2 = checkpoint kinase 2.

**Supplementary Table 2.** Effect of DNA damage response inhibition on median-effect doses of TMZ and G47 $\Delta$  in vitro\*

| Cell line            | ED <sub>50</sub> : TMZ or G47 $\Delta$ |                    |
|----------------------|----------------------------------------|--------------------|
|                      | TMZ, $\mu$ M                           | G47 $\Delta$ , MOI |
| <b>U87</b>           |                                        |                    |
| without inhibitor    | 300                                    | 0.08               |
| + NU7026             | 268                                    | 0.07               |
| + KU55933            | 202                                    | 0.14               |
| + CGK733             | 153                                    | 0.14               |
| + LCA                | 266                                    | 0.08               |
| + PARP inhibitor XIV | 274                                    | 0.08               |
| + UCN-01             | 197                                    | 0.08               |
| + Chk2 inhibitor II  | 268                                    | 0.08               |
| + triciribine        | 275                                    | 0.08               |
| + 3-MA               | 377                                    | 0.1                |
| <b>U373</b>          |                                        |                    |
| without inhibitor    | 230                                    | 0.08               |
| + NU7026             | 200                                    | 0.08               |
| + KU55933            | 152                                    | 0.13               |
| + CGK733             | 141                                    | 0.14               |
| <b>GBM4</b>          |                                        |                    |
| without inhibitor    | 32                                     | 0.21               |
| + KU55933            | 13                                     | 0.31               |
| + CGK733             | 10                                     | 0.3                |
| <u>shRNA</u>         |                                        |                    |
| Non-target           | 41                                     | 0.2                |
| ATM                  | 21                                     | 0.29               |
| ATR                  | 30                                     | 0.2                |
| ATM/ATR              | 13                                     | 0.3                |
| MSH6                 | 408                                    | 0.25               |
| <b>GBM8</b>          |                                        |                    |
| without inhibitor    | 5.8                                    | 0.1                |
| + KU55933            | 1.9                                    | 0.19               |
| + CGK733             | 1.3                                    | 0.21               |
| <u>shRNA</u>         |                                        |                    |
| Non-target           | 5.2                                    | 0.1                |
| ATM                  | 2.2                                    | 0.16               |
| ATR                  | 2.8                                    | 0.1                |
| ATM/ATR              | 1.9                                    | 0.15               |
| <b>GBM13 + BG</b>    |                                        |                    |
| without inhibitor    | 325                                    | 0.05               |
| + KU55933            | 192                                    | 0.07               |
| + CGK733             | 111                                    | 0.09               |

| BT74 + BG         |     |      |
|-------------------|-----|------|
| without inhibitor | 415 | 0.23 |
| + KU55933         | 222 | 0.31 |
| + CGK733          | 194 | 0.31 |
| <u>shRNA</u>      |     |      |
| Non-target        | 450 | 0.24 |
| ATM               | 220 | 0.31 |
| ATR               | 425 | 0.23 |
| ATM/ATR           | 201 | 0.29 |

\*Inhibitory doses (ED<sub>50</sub>) for TMZ and G47Δ in the presence of pharmacological inhibitors (non-toxic concentrations from Supplementary Table 1) or shRNA in GSCs and glioma cell lines. Sensitivity to TMZ was determined 5 days after adding TMZ. Sensitivity to G47Δ was determined 4.5 days after infection. ED<sub>50</sub> (dose required for 50% effect) values were determined from dose–response curves. TMZ = temozolomide; BG = O<sup>6</sup>-benzylguanine; DNA-PKcs = DNA-dependent protein kinase, catalytic subunit; PARP = poly(ADP-ribose) polymerase; ATM = ataxia telangiectasia mutated; ATR = ataxia telangiectasia and Rad3-related.

# Supplementary Figure 1

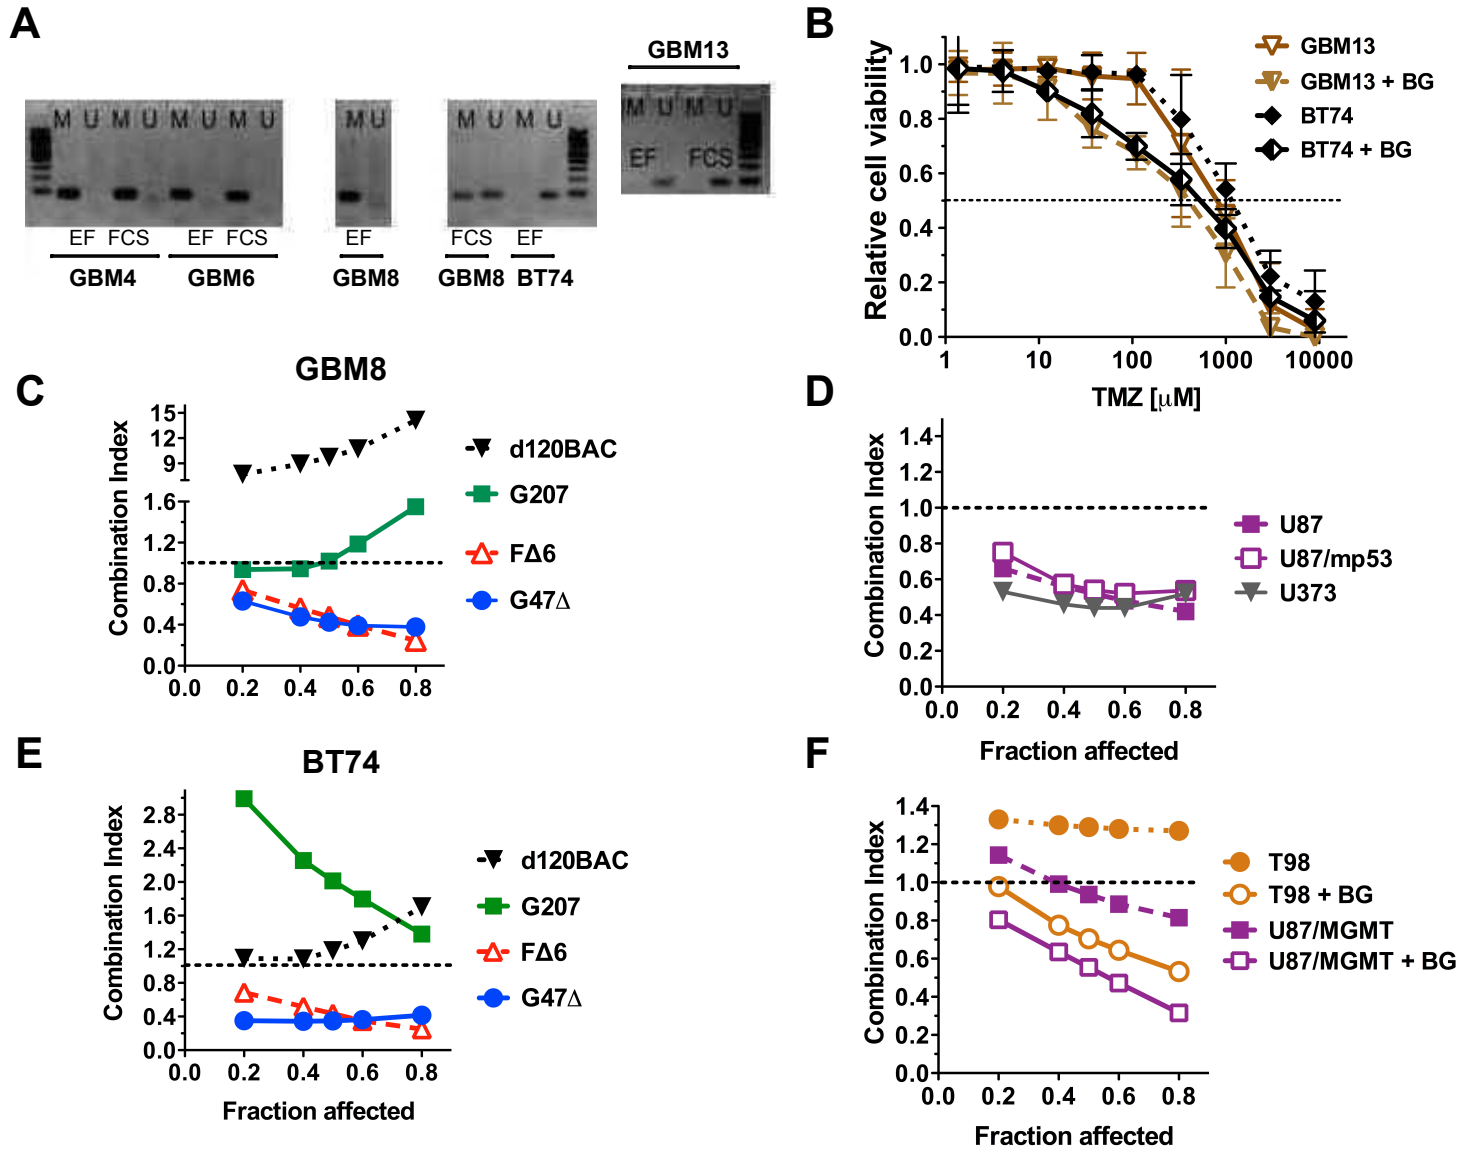

**Supplementary Figure 1. MGMT status of GSCs and interaction of TMZ and HSV in glioma cell killing.** **A)**

DNA methylation status of MGMT promoter was examined by methylation specific polymerase chain reaction (MSP). EF and FCS denote GSCs and GBM primary cells cultured in serum-containing media, respectively, from the same patient specimen. M and U denote methylated and unmethylated, respectively. **B)** Dose response curves for TMZ in MGMT-positive GSCs and with BG (50 $\mu$ M, 2 h before TMZ). Cell viability was measured by MTS assay. Error bars represent 95% confidence intervals. **C-F)** Interaction of TMZ and HSV in GSC and glioma cell line killing examined by the median effect method of Chou-Talalay. Data are shown as Fraction affected–Combination Index (CI) plots.  $CI < 1$ ,  $CI = 1$ , and  $CI > 1$  represent synergistic, additive, and antagonistic interactions respectively. **C)** Comparison between G47 $\Delta$  and HSV mutants G207, F $\Delta$ 6, and d120BAC in GBM8. **D)** The interaction of TMZ and G47 $\Delta$  in MGMT-negative glioma cell lines, including U87 expressing mutant p53. **E)** Comparison between G47 $\Delta$  and HSV mutants G207, F $\Delta$ 6, and d120BAC in BT74 in the presence of BG (50 $\mu$ M). **F)** The interaction of TMZ and G47 $\Delta$  in MGMT-positive glioma cell lines, and with BG (20 $\mu$ M). GSC = glioblastoma stem cell; TMZ = temozolomide; MGMT = O<sup>6</sup>-methylguanine-DNA-methyltransferase; BG = O<sup>6</sup> benzylguanine.

## Supplementary Figure 2

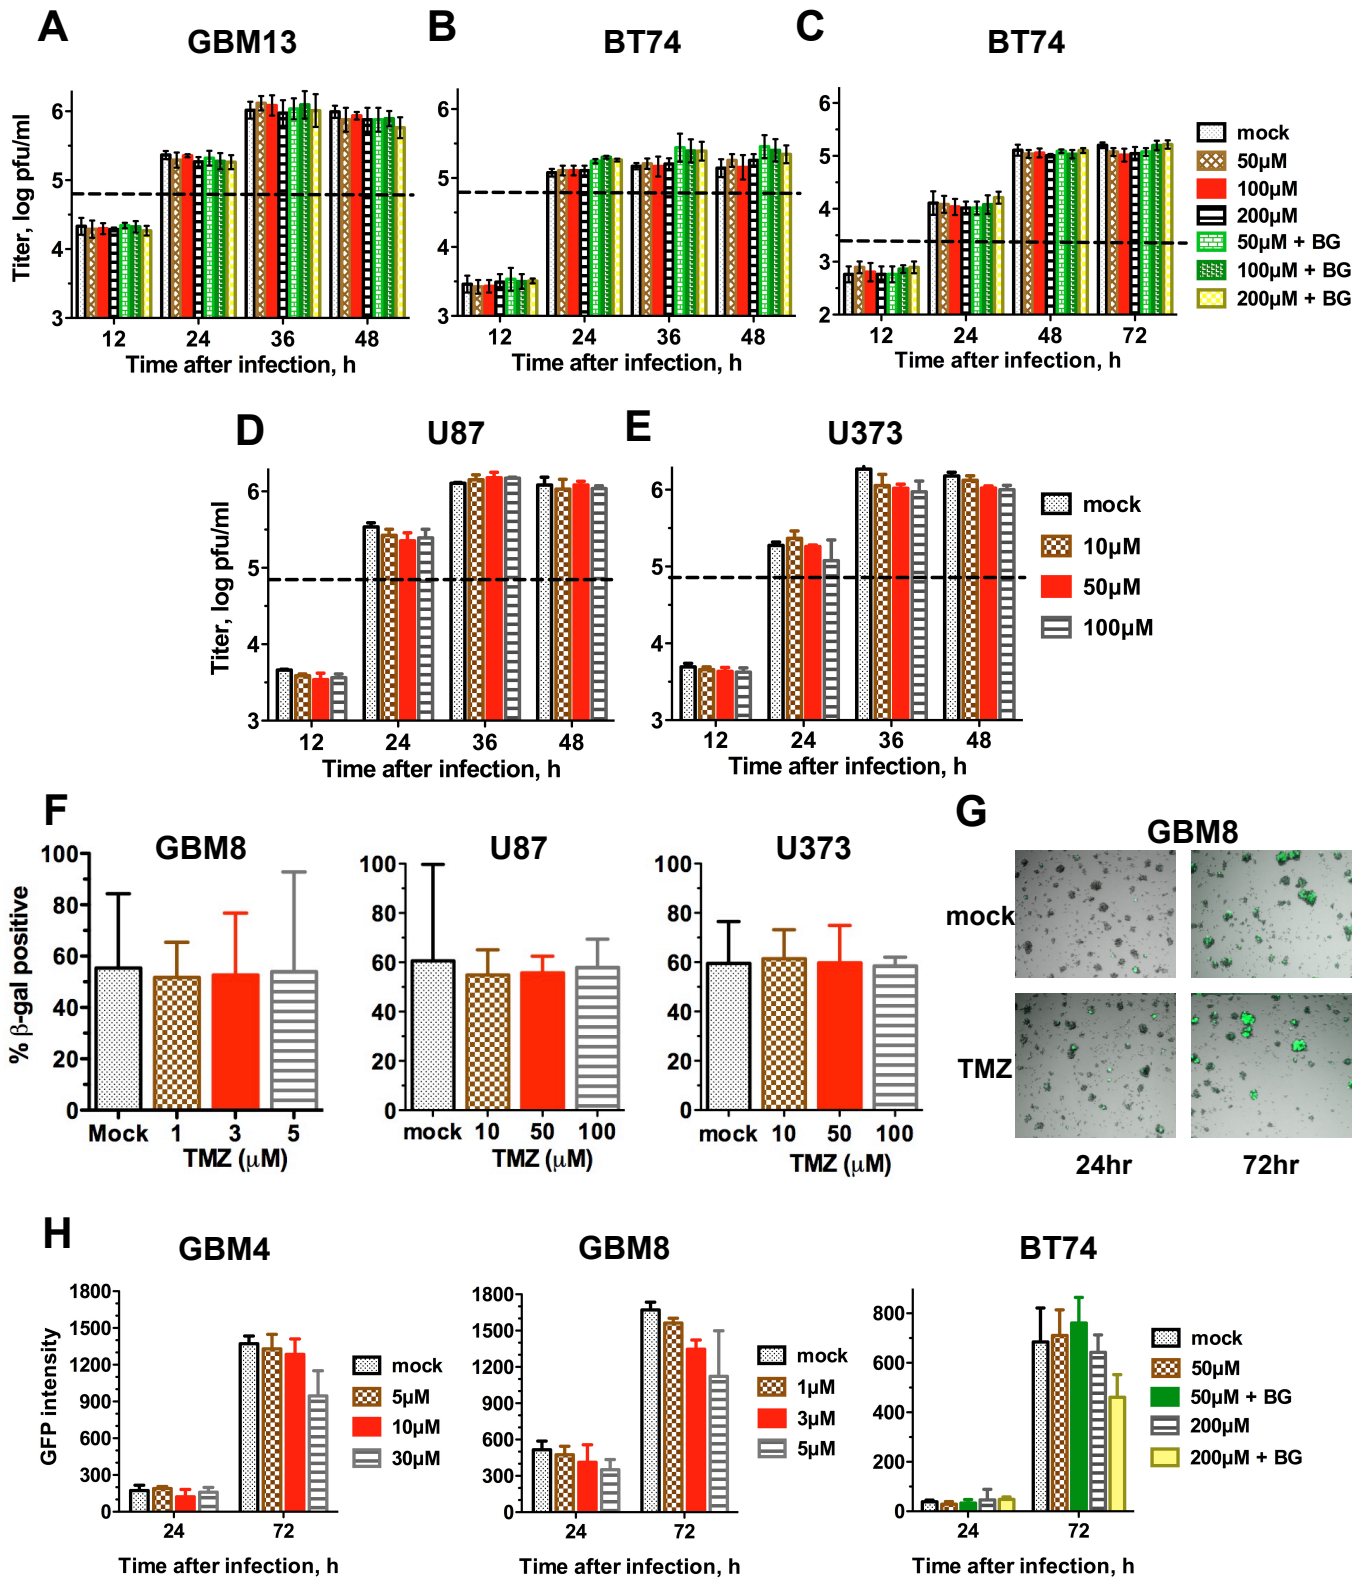

**Supplementary Figure 2. Effect of TMZ on G47 $\Delta$  replication, infectivity and spread in GBM cells in vitro.** **A-E)** G47 $\Delta$  replication was examined in the presence of indicated concentrations of TMZ. Cells (GBM13, **A**; BT74, **B, C**; U87, **D**; U373, **E**) were treated with TMZ 24 hours before infection with G47 $\Delta$  at MOI=1.5 (**A, B, D, E**) or MOI=0.1 (**C**). MGMT-positive GBM13 and BT74 were also treated with indicated concentrations of TMZ and BG (50 $\mu$ M). At the indicated times after infection, cells and media were collected and virus titers were determined by plaque assay on Vero cells. Error bars represent 95% confidence intervals. Dashed lines indicate the dose of G47 $\Delta$  used for infection. There were no statistically significant differences between mock and high dose TMZ (unpaired t-test, two-sided). **F)** G47 $\Delta$  infectivity was examined in the presence of indicated TMZ concentrations. The proportion of X-gal staining cells was determined (%  $\beta$ -galactosidase positive). Error bars represent 95% confidence intervals. **Left: GBM8, Middle: U87, Right: U373.** There were no statistically significant differences between mock and high dose TMZ (unpaired t-test, two-sided). **G, H)** GSCs were infected with EGFP-expressing G47 $\Delta$ BAC at MOI=0.1 in the presence of indicated concentrations of TMZ or TMZ+BG (50 $\mu$ M). **G)** Representative microscope images (phase contrast overlaid with fluorescence, green for EGFP) for GBM8. **H)** The GFP signal intensity was measured as an indication of viral spread. Error bars represent 95% confidence intervals. **Left: GBM4, Middle: GBM8, Right: BT74.** At 72 hours, high TMZ doses killed cells and thus decreased GFP intensity. GBM = glioblastoma; TMZ = temozolomide; MOI = multiplicity of infection; BG = O<sup>6</sup>-benzylguanine; MGMT = O<sup>6</sup>-methylguanine-DNA-methyltransferase; GSCs = glioblastoma stem cells; EGFP = enhanced green fluorescent protein.

# Supplementary Figure 3

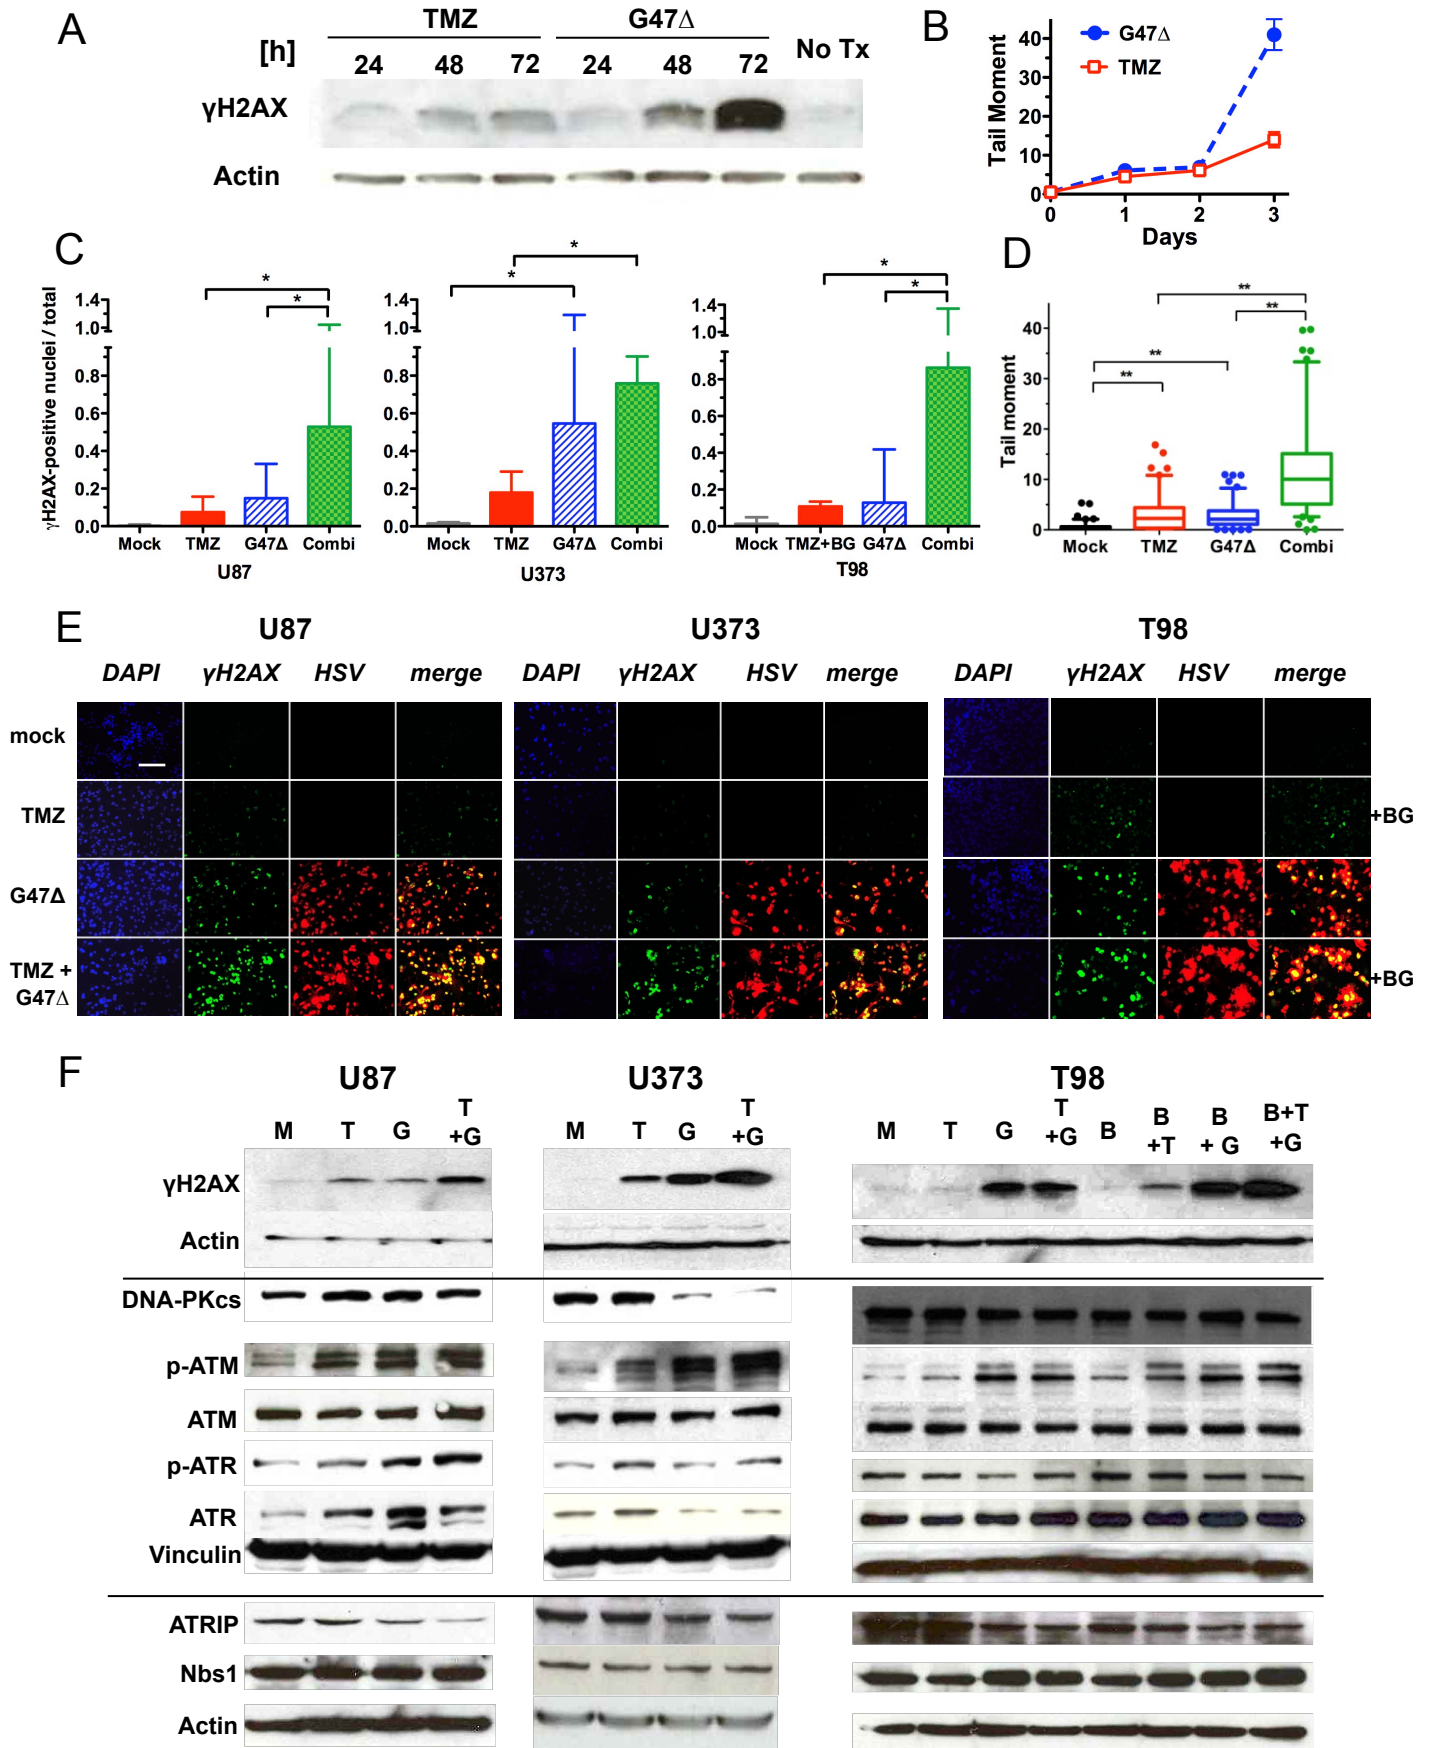



**Supplementary Figure 3. Induction of DNA damage and DNA damage responses in glioma cell lines in vitro.**

**A)** Induction of  $\gamma$ H2AX by TMZ or by G47 $\Delta$ . U87 cells were treated with TMZ (50 $\mu$ M) or G47 $\Delta$  (MOI=0.1), collected at the indicated times after treatment, and processed for western blotting. **B)** U87 cells were treated with TMZ (50  $\mu$ M) or G47 $\Delta$  (MOI=0.1). Each day after treatment, cells were collected and processed for the neutral comet assay. Error bars represent 95% confidence intervals. **C)**  $\gamma$ H2AX positive cells/total cells in U87 (**Left**), U373 (**Middle**), and T98 (**Right**) were quantified by counting in three randomly selected fields. Error bars represent 95% confidence intervals. Asterisks denote statistically significant differences (1 way ANOVA, Bonferroni's Multiple Comparison Test,  $P < .05$ ). For U87, Mock vs TMZ: difference = -0.073, 95% CI = -0.13 to -0.02,  $P = .02$ ; Mock vs G47 $\Delta$ : difference = -0.15, 95% CI = -0.26 to -0.03,  $P = 0.02$ ; TMZ vs Combi: difference = -0.45, 95% CI = -0.79 to -0.12,  $P = .02$ ; G47 $\Delta$  vs Combi: difference = -0.38, 95% CI = -0.73 to -0.027,  $P = .04$ . For U373, Mock vs TMZ: difference = -.16, 95% CI = -0.24 to 0.092,  $P = .003$ ; Mock vs G47 $\Delta$ : difference = -0.53, 95% CI = -0.94 to -0.12,  $P = .02$ ; TMZ vs Combi: difference = -0.58, 95% CI = -0.70 to -0.46,  $P < .001$ . For T98, Mock vs TMZ + BG: difference = -0.095, 95% CI = -0.12 to -0.066,  $P < .001$ ; TMZ+BG vs Combi: difference = -0.75, 95% CI = -1.06 to -0.44,  $P = .002$ ; G47 $\Delta$  vs Combi: difference = -0.73, 95% CI = -1.1 to -0.37,  $P = .004$  (unpaired  $t$ -test, two-sided). **D)** DNA damage was assessed by neutral comet assay. U87 cells were treated with TMZ (50 $\mu$ M) for 36 hours, then infected with G47 $\Delta$  (MOI=1), and processed for the neutral comet assay 24 h later. Asterisks denote statistically significant differences (1 way ANOVA, Bonferroni's Multiple Comparison Test,  $P < .05$ ). For U87, Mock vs TMZ: difference = -2.6, 95% CI = -3.4 to -1.9,  $P < .001$ ; Mock vs G47 $\Delta$ : difference = -2.3, 95% CI = -2.9 to -1.8,  $P < .001$ ; TMZ vs Combi: difference = -4.4, 95% CI = -10 to -6.6,  $P < .001$ ; G47 $\Delta$  vs Combi: difference = -8.7, 95% CI = -10 to 7.0,  $P < .001$  (unpaired  $t$ -test, two-sided). **E)** MGMT-negative U87 (**Left**) and U373 (**Middle**) glioma cells were mock-treated or treated with TMZ (50 $\mu$ M). MGMT-positive T98 (**Right**) glioma cells were mock-treated or treated with TMZ (200 $\mu$ M) + BG (20  $\mu$ M). 36 hours after TMZ or TMZ + BG, cells were infected with mock or G47 $\Delta$  at MOI=1, and 24 hours later, cells were fixed and processed for immunocytochemistry (DAPI, blue;  $\gamma$ H2AX, green; HSV, red; merge, yellow). Scale bar = 100 $\mu$ m. **F)** Cells were treated as in **E**, except processed for western blotting. M: mock, T = TMZ, G = G47 $\Delta$ , B = BG. TMZ = temozolomide; BG = O<sup>6</sup>-benzylguanine; MGMT = O<sup>6</sup>-methylguanine-DNA methyltransferase; MOI = multiplicity of infection; DAPI = 4',6-diamidino-2-phenylindole; ATM = ataxia telangiectasia mutated; ATR = ataxia telangiectasia and Rad3-related; p-ATM = phosphorylated ATM (Ser1981); p-ATR = phosphorylated ATR (Ser428); ATRIP = ATR interacting protein; DNA-PKcs = DNA-dependent protein kinase catalytic subunit Nbs1 = Nijmegen breakage syndrome 1.

Supplementary Figure 4

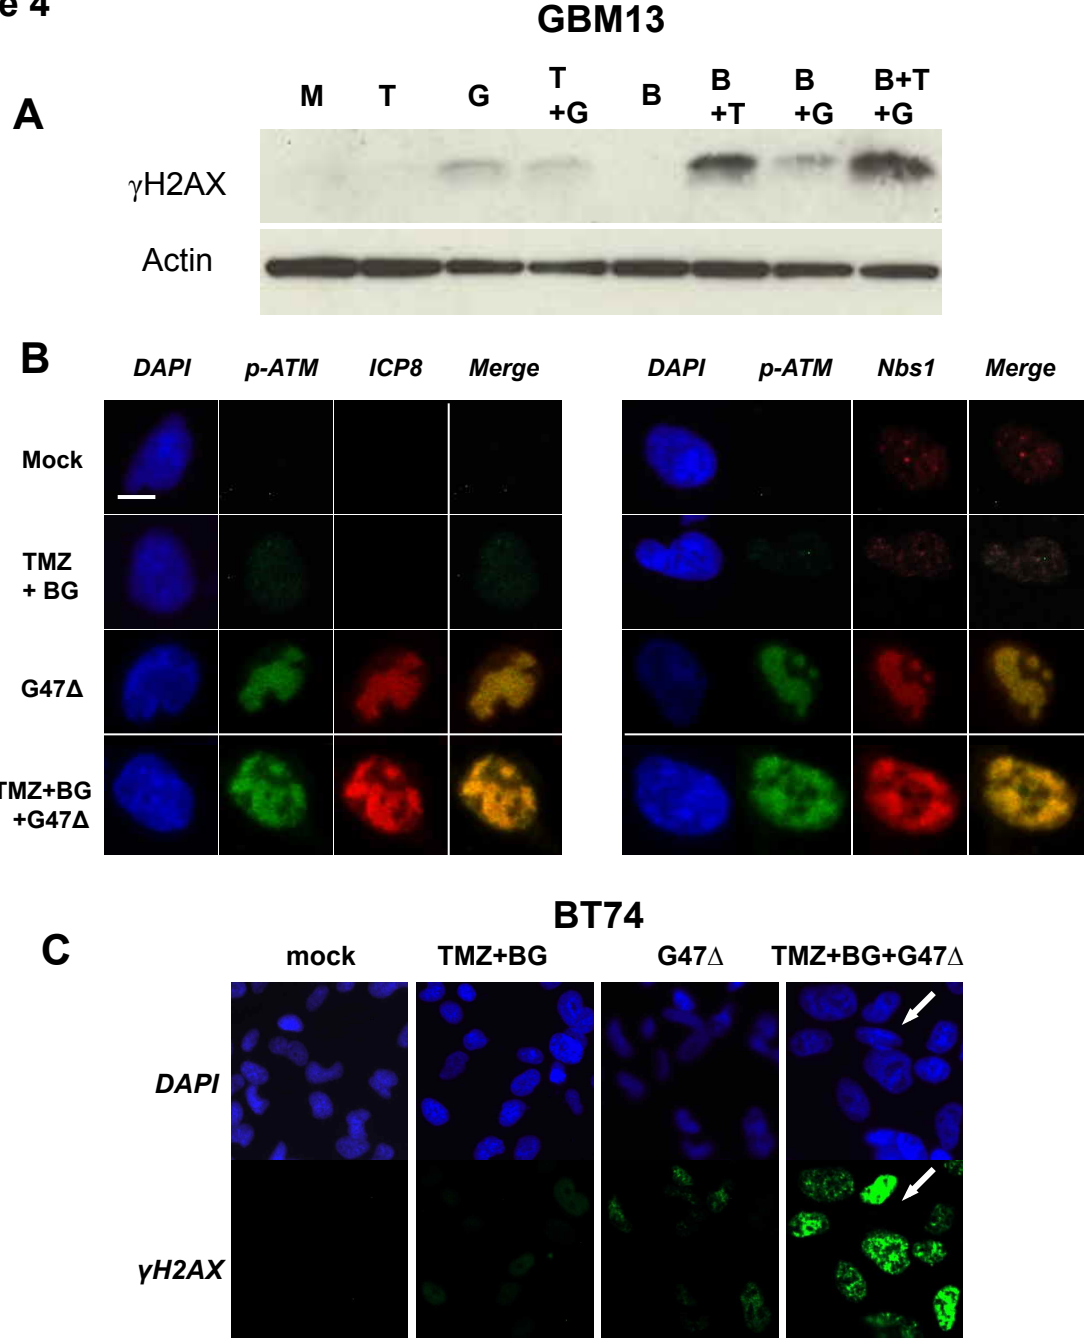

**Supplementary Figure 4. Induction of  $\gamma$ H2AX, and localization of DNA damage response proteins and G47 $\Delta$  replication compartments in GSCs in vitro.** **A)**  $\gamma$ H2AX induction in GBM13 cells (MGMT-positive). Cells were mock-treated (M) or treated with TMZ (T, 200 $\mu$ M) and/or BG (B, 50 $\mu$ M) for 36 hours, and then mock-infected or infected with G47 $\Delta$  (G, MOI=1), and 24 hours later, cells were fixed and processed for western blotting. Actin is the protein loading control. **B)** Accumulation of activated ATM (p-ATM) and Nbs1 (MRN complex) at G47 $\Delta$  replication compartments. GBM13 (TMZ=200 $\mu$ M, BG=50 $\mu$ M) cells were fixed 6 hours after infection (MOI=5) and examined for immunofluorescence (DAPI, blue; p-ATM, green; ICP8 and Nbs1, red; merge, yellow). Scale bar=10 $\mu$ m. **C)** Nuclear accumulation of  $\gamma$ H2AX in BT74 cells treated with PBS (mock), TMZ (200 $\mu$ M)+BG (50 $\mu$ M), G47 $\Delta$  (MOI=1), or combination ( $\gamma$ H2AX, green; DAPI, blue). Arrow points to  $\gamma$ H2AX-negative nucleus. This is the same experiment illustrated in Figure 2,B. TMZ = temozolomide; GSCs = glioblastoma stem cells; MGMT = O<sup>6</sup>-methylguanine-DNA methyltransferase; BG = O<sup>6</sup>-benzylguanine; MOI = multiplicity of infection; DAPI = 4',6-diamidino-2-phenylindole; ATM = ataxia telangiectasia mutated; p-ATM = phosphorylated ATM (Ser1981); Nbs1 = Nijmegen breakage syndrome 1.

# Supplementary Figure 5

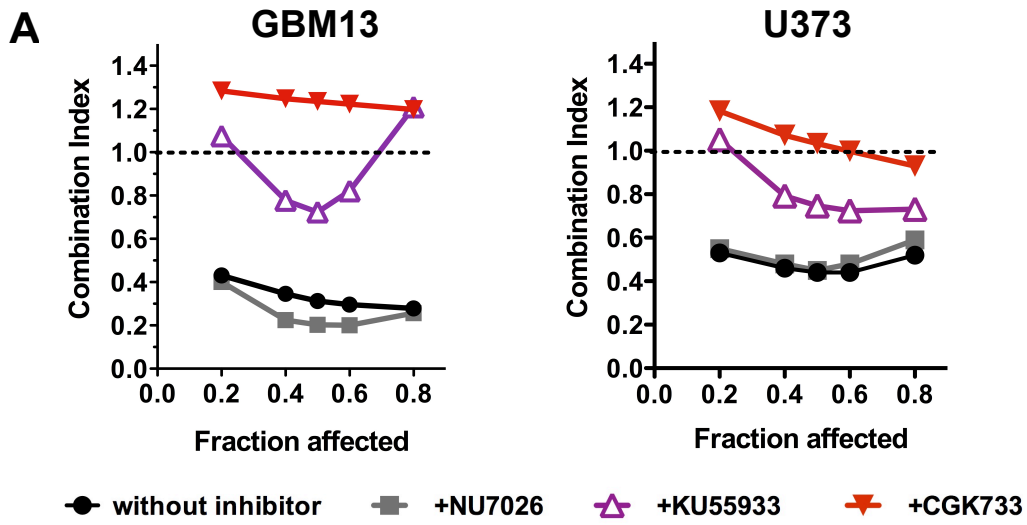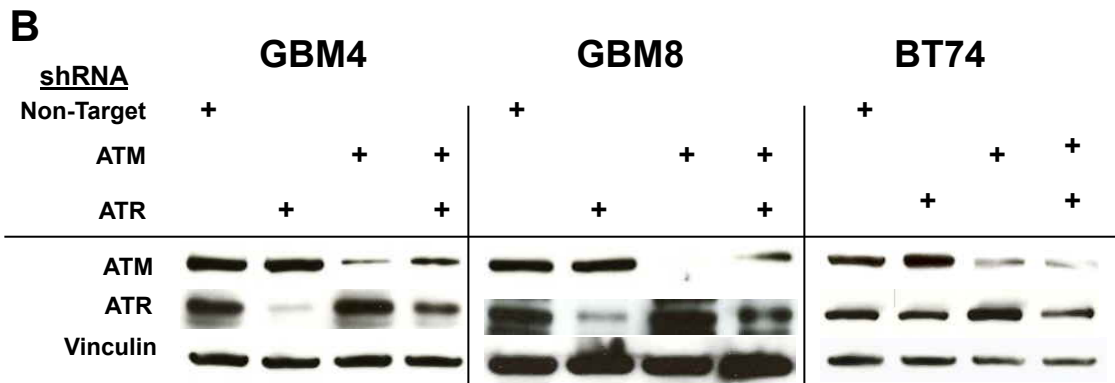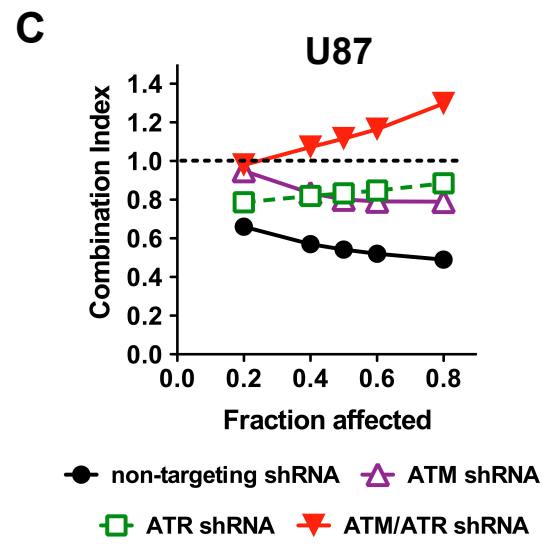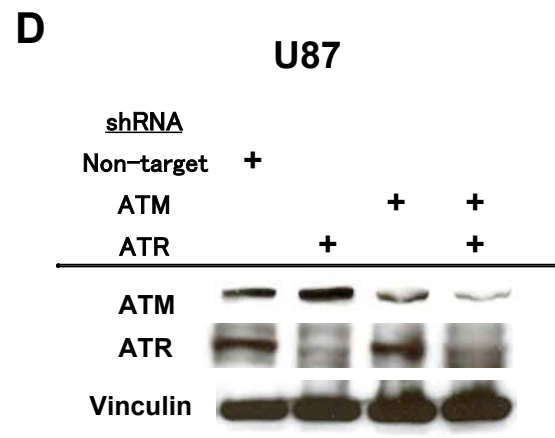

**Supplementary Figure 5. Effect of ATM/ATR inhibition or knock-down on synergy in glioblastoma cells. A)**

The interactions between TMZ and G47 $\Delta$  in GBM13 (**Left**) and U373 (**Right**) cells were examined in the presence of DNA-PKcs inhibitor NU7026, and ATM inhibitors KU55933 or CGK733. Data are shown as Fraction affected-Combination Index (CI) plot. **B)** Western blot for ATM and ATR from GSCs lentivirally-transduced with the indicated shRNAs (used in Figure 3C and Supplementary Figure 6B). **C)** The interactions between TMZ and G47 $\Delta$  were examined in U87 cells lentivirally-transduced with shRNAs targeting ATM, ATR, ATM/ATR, or non-targeting. Data are shown as Fraction affected-Combination Index (CI) plot. **D)** Western blot for ATM and ATR from U87 lentivirally-transduced with the indicated shRNAs. CI < 1, CI = 1, and CI > 1 represent synergistic, additive, and antagonistic interactions, respectively. ATM = ataxia telangiectasia mutated; ATR = ataxia telangiectasia and Rad3-related; DNA-PKcs = DNA-dependent protein kinase catalytic subunit; GSCs = glioblastoma stem cells; shRNA = small hairpin RNA.

# Supplementary Figure 6

**A**

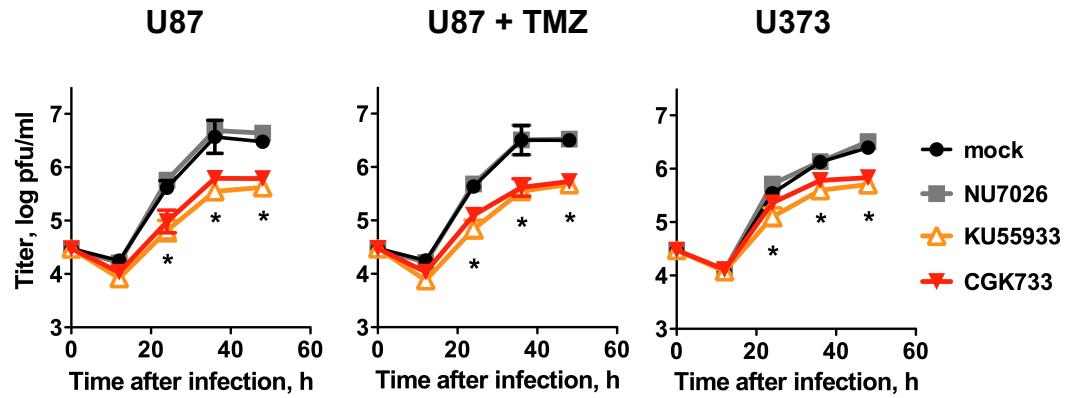

**B**

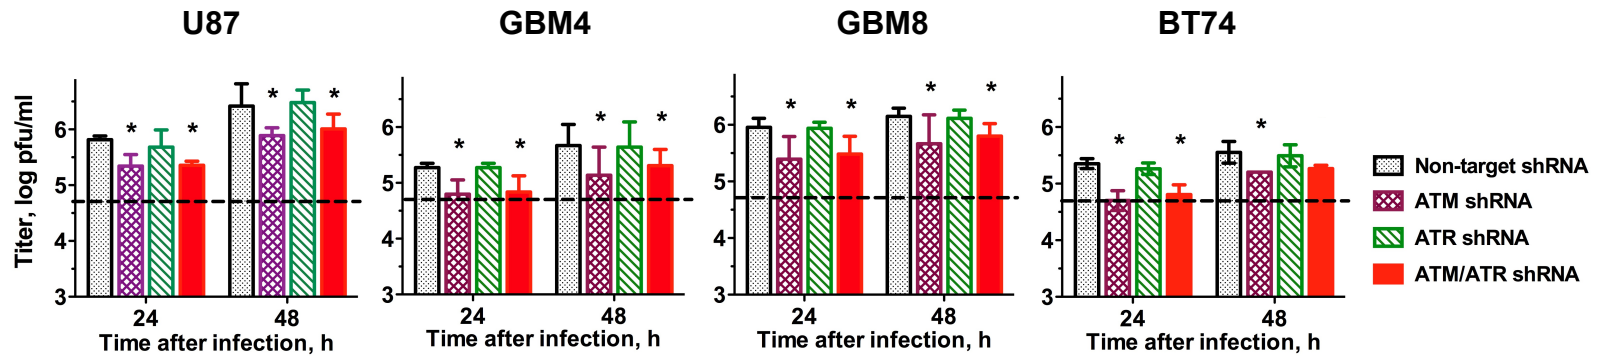

**Supplementary Figure 6. Effect of inhibitors or knock-down of ATM on G47Δ replication.** **A)** G47Δ replication in the presence of DNA-PKcs inhibitor NU7026, or ATM inhibitors KU55933 or CGK733 with or without TMZ in U87 and U373 cells. Cells were infected with G47Δ at MOI=1.5 in the presence of NU7026, KU55933, or CGK733, and at the indicated times after infection, cells and media were harvested, and virus yields were determined by plaque assay on Vero cells. **Left:** U87 without TMZ, **Middle:** U87 with TMZ (50μM), **Right:** U373 without TMZ. Asterisk denotes statistically significant differences (unpaired *t*-test, two-tailed) in G47Δ titers between mock and KU55933 (for U87  $P = .004, =.006, <.001$  (difference=0.86, 95% CI = 0.73 to 0.98) at 24, 36, 48 h respectively; for U87+TMZ  $P = .003, =.005, <.001$  (difference = 0.82, 95% CI = 0.62 to 1.02) at 24, 36, 48 h respectively; for U373  $P = .01, =.001, =.002$  (difference = 0.69, 95% CI = 0.44 to 0.94) at 24, 36, 48 h respectively) or CGK733 (for U87  $P = .01, =.01, <.001$  (difference = 0.69, 95% CI= 0.58 to 0.80) at 24, 36, 48 h respectively; for U87 + TMZ  $P = .002, =.008, <.001$  (difference = 0.77, 95% CI = 0.61 to 0.93) at 24, 36, 48 h respectively; for U373  $P = .001, <.001, <.001$  (difference = 0.56, 95% CI = 0.40 to 0.73) at 24, 36, 48 h respectively) treated cells at indicated times after infection. Error bars represent 95% confidence intervals. **B)** G47Δ replication in GSCs and U87 cells lentivirally-transduced with shRNA targeting ATM, ATR, ATM/ATR, and non-targeted. Cells were treated as in **A**. Asterisk denotes statistically significant differences (unpaired *t*-test, two-tailed) in G47Δ titers between non-target shRNA-treated cells and ATM shRNA-treated (U87 24h: difference = 0.47, 95% CI = 0.33 to 0.61,  $P < .001$ ; U87 48h: difference = 0.53, 95% CI = 0.26 to 0.80,  $P = .006$ ; GBM4 24h: difference = 0.47, 95% CI = 0.30 to 0.65,  $P = .002$ ; GBM4 48h: difference = 0.53, 95% CI = 0.12 to 0.94,  $P = .02$ ; GBM8 24h: difference = 0.56, 95% CI = 0.28 to 0.84,  $P = .005$ ; GBM8 48h: difference = 0.48, 95% CI = 0.14 to 0.82,  $P = .02$ ; BT74 24h: difference = 0.65, 95% CI = 0.34 to 0.96,  $P = .004$ ; BT74 48h: difference = 0.35, 95% CI= 0.04 to 0.66,  $P = .03$ ) or ATM/ATR shRNA-treated (U87 24h: difference = 0.46, 95% CI = 0.39 to 0.52,  $P < .001$ ; U87 48h: difference = 0.41, 95% CI = 0.10 to 0.72,  $P = .02$ ; GBM4 24h: difference = 0.44, 95% CI = 0.24 to 0.63,  $P = .003$ ; GBM4 48h: difference = 0.36, 95% CI = 0.05 to 0.67,  $P = .03$ ; GBM8 24h: difference = 0.47, 95% CI = 0.25 to 0.70,  $P = .004$ ; GBM8 48h: difference = 0.35, 95% CI = 0.18 to 0.52,  $P = .005$ ; BT74 24h: difference = 0.55, 95% CI = 0.24 to 0.86,  $P = .008$ ; BT74 48h: NS) cells at indicated times after infection. Error bars represent 95% confidence intervals. Dashed lines indicate the dose of input virus. From **left to right:** U87, GBM4, GBM8, BT74. TMZ = temozolomide; MOI = multiplicity of infection; GSCs = glioblastoma stem cells; DNA-PKcs = DNA-dependent protein kinase catalytic subunit; ATM = ataxia telangiectasia mutated; ATR = ataxia telangiectasia and Rad3-related; shRNA = short hairpin RNA; NS = not statistically significant.
